# Supplementary material for: Reference Genes for Expression Analyses by qRT-PCR in Enterobacter cancerogenus
Source: MDPI journal article supplement (doi:10.3390/microorganisms12051024), 2024-05-19
Supplement: s1 [file s1]

# Supplementary Materials

## Reference genes for expression analyses by qRT-PCR in *Enterobacter cancerogenus*

Yang Pan, Yue Zhao, Hua-Rui Zeng, Jia-Qi Wu, Ying-Ying Song, Ya-Hao Rao, Guo-Qing Li and Lin Jin \*

**Table S1.** Specificity verification of 13 candidate house-keeping genes.

| Gene name       | Description                          | Per. Ident | Accession number |
|-----------------|--------------------------------------|------------|------------------|
| <i>gyrB</i>     | <i>E. cancerogenus</i> EcHa1         | 100.00%    | CP082280.1       |
| <i>gyrA</i>     | <i>E. cancerogenus</i> 3.2.17        | 100.00%    | CP134403.1       |
|                 | <i>E. cancerogenus</i> EcHa1         |            | CP082280.1       |
| <i>era</i>      | <i>E. cancerogenus</i> 3.2.17        | 100.00%    | CP134403.1       |
|                 | <i>E. cancerogenus</i> EcHa1         |            | CP082280.1       |
| <i>secA</i>     | <i>E. cancerogenus</i> 3.2.17        | 100.00%    | CP134403.1       |
|                 | <i>E. cancerogenus</i> EcHa1         |            | CP082280.1       |
| <i>dnaG</i>     | <i>E. cancerogenus</i> EcHa1         | 100.00%    | CP082280.1       |
|                 | <i>E. cancerogenus</i> 3.2.17        |            | CP134403.1       |
| <i>ftsZ</i>     | <i>E. cancerogenus</i> EcHa1         | 100.00%    | CP082280.1       |
|                 | <i>E. cancerogenus</i> 3.2.17        |            | CP134403.1       |
| <i>RPSD</i>     | <i>E. cancerogenus</i> EcHa1         | 100.00%    | CP082280.1       |
|                 | <i>E. cancerogenus</i> 3.2.17        |            | CP134403.1       |
| <i>16S rRNA</i> | <i>E. cancerogenus</i> EcHa1         | 100.00%    | CP082280.1       |
|                 | <i>E. cancerogenus</i> 3.2.17        |            | CP134403.1       |
| <i>rpoB</i>     | <i>E. cancerogenus</i> EcHa1         | 100.00%    | CP082280.1       |
|                 | <i>E. cancerogenus</i> 3.2.17        |            | CP134403.1       |
| <i>proC</i>     | <i>E. cancerogenus</i> EcHa1         | 100.00%    | CP082280.1       |
| <i>pyk</i>      | <i>E. cancerogenus</i> EcHa1         | 100.00%    | CP082280.1       |
| <i>rho</i>      | <i>E. cancerogenus</i> EcHa1         | 100.00%    | CP082280.1       |
|                 | <i>E. cancerogenus</i> MiY-F         |            | CP045769.1       |
|                 | <i>E. cancerogenus</i> CR-Eb1        |            | CP025225.1       |
|                 | <i>E. cancerogenus</i> 3.2.17        |            | CP134403.1       |
| <i>rplD</i>     | <i>E. cancerogenus</i> EcHa1         | 100.00%    | CP082280.1       |
|                 | <i>E. cancerogenus</i> JY65          |            | CP081105.1       |
|                 | <i>E. cancerogenus</i> FDAARGOS 1428 |            | CP077290.1       |
|                 | <i>E. cancerogenus</i> UPC1          |            | LR881936.1       |

**Table S2.** Primers of 13 candidate house-keeping genes and pathogenic factor Hcp used in qRT-PCR.

| Gene        | Primer sequences (5' to 3')                         | Length of amplicon sequence (bp) | Slope   | R <sup>2</sup> | Efficiency (%) |
|-------------|-----------------------------------------------------|----------------------------------|---------|----------------|----------------|
| <i>gyrB</i> | F- CTGAAAGCGCTGGTGTATCA<br>R- GTGCTGTTTCGTTCTCGTTCA | 114                              | -3.2358 | 0.992          | 103.72         |
| <i>gyrA</i> | F- GGTAATATCACCCGCATGG<br>R- CAGCATGTAACGCAAGGAGA   | 84                               | -3.1297 | 0.995          | 108.70         |
| <i>era</i>  | F- GGCAAATCCACCCTGTAAAA<br>R- TTCAGTATGGATGCCCCACAA | 102                              | -3.3982 | 0.996          | 96.91          |
| <i>secA</i> | F- GCGTACCGGTGAAGGTAAAA<br>R- TCACGCTGTGCCAGATAGTC  | 111                              | -2.6125 | 0.937          | 141.42         |
| <i>dnaG</i> | F- TACCGGGCAGCTTTTAGAGA<br>R- TCGTTCAGGCTGAGAGTTT   | 75                               | -2.9280 | 0.998          | 119.55         |
| <i>ftsZ</i> | F- GCAAGAAGCGTATGGCTTTC<br>R- AAGCGTCAAGCAGGGAGATA  | 129                              | -3.1010 | 0.999          | 110.12         |
| <i>RPS</i>  | F- AGGGCACCGACTTATTCCTT                             | 136                              | -3.6251 | 0.994          | 88.74          |
| <i>D</i>    | R- TTTTGCTTTTCACGCAACTG                             |                                  |         |                |                |
| <i>16S</i>  | F- CGATCCCTAGCTGGTCTGAG                             | 93                               | -3.1003 | 0.997          | 110.16         |
| <i>rRNA</i> | R- GTGCAATATTCCCCACTGCT                             |                                  |         |                |                |
| <i>rpoB</i> | F- GATCAACTCCCTGTCCGTGT<br>R- GAGTTCGCCTGAGCGATAAC  | 150                              | -2.7870 | 0.992          | 128.46         |
| <i>proC</i> | F- GCTGGTCAATGCTGGTATGA<br>R- CACATCGGCAATGTCTTCAG  | 70                               | -2.8402 | 0.991          | 124.95         |
| <i>pyk</i>  | F- TCAGTTCGACAACGTGGAAG<br>R- ATACGGGAGGTCATCAGTGC  | 126                              | -3.3120 | 0.991          | 100.42         |
| <i>rho</i>  | F- ACTGCGTACTGATGGTGCTG<br>R- GATGCTGGTTCGTCAAAGGT  | 109                              | -3.2561 | 0.997          | 102.82         |
| <i>rplD</i> | F- ATGGCTCTGGAAGATGTGCT<br>R- CGTACGTCAACCTTGTGCAG  | 89                               | -2.7904 | 0.993          | 128.23         |
| <i>Hcp</i>  | F-TCTTCTGAACCGTCTCCTGC<br>R-AACTGCCCCTTAAGCTCCTT    | 177                              | -3.1726 | 0.999          | 106.63         |
